# Supplementary material
Source: bioRxiv or medRxiv preprint supplement (https://www.biorxiv.org/highwire/filestream/14385/field_highwire_adjunct_files/3/052571-4.pdf)
Supplement: Supplementary file [file 052571-4.pdf]

Table S3. **Enriched biological process from GREAT analysis of accessible chromatin sites.** Genomic coordinates of accessible chromatin sites were used as input for Genomic Regions Enrichment of Annotations Tool (GREAT) analysis (see Materials and Methods).

| Chromatin sites |                     | Total enriched GO terms* | GO biological process                                                                      | -log <sub>10</sub> (p-value) |
|-----------------|---------------------|--------------------------|--------------------------------------------------------------------------------------------|------------------------------|
| Variable        | TE (934)            | 9                        | negative regulation of cellular carbohydrate metabolic process                             | 5.29                         |
|                 |                     |                          | regulation of gluconeogenesis                                                              | 4.86                         |
|                 |                     |                          | negative regulation of carbohydrate metabolic process                                      | 4.73                         |
|                 |                     |                          | negative regulation of insulin secretion involved in cellular response to glucose stimulus | 4.64                         |
|                 |                     |                          | regulation of lipid storage                                                                | 4.48                         |
|                 |                     |                          | regulation of glucose metabolic process                                                    | 4.46                         |
|                 |                     |                          | negative regulation of gluconeogenesis                                                     | 4.43                         |
|                 |                     |                          | negative regulation of lipid storage                                                       | 4.37                         |
|                 |                     |                          | negative regulation of peptide hormone secretion                                           | 4.14                         |
|                 | Younger LINEs (164) | 2                        | negative regulation of gluconeogenesis                                                     | 7.98                         |
|                 |                     |                          | negative regulation of cellular carbohydrate metabolic process                             | 7.93                         |
|                 | No repeats (1056)   | 2                        | filopodium assembly                                                                        | 4.98                         |
|                 |                     |                          | antigen processing and presentation of peptide antigen via MHC class I                     | 4.29                         |
|                 | Other repeats (549) | 0                        |                                                                                            |                              |
| Common          | TE (822)            | 5                        | cellular response to peptide hormone stimulus                                              | 4.94                         |
|                 |                     |                          | oxaloacetate metabolic process                                                             | 4.13                         |
|                 |                     |                          | regulation of triglyceride metabolic process                                               | 4.01                         |
|                 |                     |                          | response to peptide hormone stimulus                                                       | 3.99                         |
|                 |                     |                          | triglyceride metabolic process                                                             | 3.97                         |
|                 | No repeats (1428)   | 7                        | cellular response to hydrogen peroxide                                                     | 7.00                         |
|                 |                     |                          | cellular response to oxidative stress                                                      | 6.08                         |
|                 |                     |                          | cellular response to reactive oxygen species                                               | 5.55                         |
|                 |                     |                          | intestinal absorption                                                                      | 5.38                         |
|                 |                     |                          | response to hydrogen peroxide                                                              | 4.57                         |
|                 |                     |                          | unsaturated fatty acid biosynthetic process                                                | 3.98                         |
|                 |                     |                          | regulation of glycolysis                                                                   | 3.83                         |
|                 | Other repeats (289) | 0                        |                                                                                            |                              |
